## Brain volume changes following blast-related mild TBI in service members and veterans: a LIMBIC-CENC study

Emily L Dennis PhD<sup>1,2</sup>, Jared A Rowland PhD<sup>3,4</sup>, Carrie Esopenko PhD<sup>5</sup>, Nicholas J Tustison PhD<sup>6</sup>, Mary R Newsome PhD<sup>1,2,13</sup>, Elizabeth S Hovenden<sup>1,2</sup>, Brian B Avants PhD<sup>6</sup>, Jessica Gill PhD<sup>7,8</sup>, Sidney R Hinds II MD<sup>9</sup>, Kimbra Kenney MD<sup>9,10</sup>, Hannah M Lindsey PhD<sup>1,2</sup>, Sarah L Martindale PhD<sup>3,4</sup>, Mary Jo Pugh PhD, RN<sup>11,12</sup>, Randall S Scheibel PhD<sup>13,14</sup>, Pashtun-Poh Shahim MD, PhD<sup>15</sup>, Robert Shih MD<sup>16</sup>, James R Stone MD, PhD<sup>6</sup>, Maya Troyanskaya PhD<sup>13,14</sup>, William C Walker MD<sup>17,18</sup>, Kent Werner MD, PhD<sup>9</sup>, Gerald E York MD<sup>19</sup>, David X Cifu MD<sup>17</sup>, David F Tate PhD<sup>1,2</sup>, Elisabeth A Wilde PhD<sup>1,2,13</sup>

1. Department of Neurology, University of Utah School of Medicine, Salt Lake City, UT.
2. George E. Wahlen Veterans Affairs Medical Center, Salt Lake City, UT.
3. W. G. (Bill) Hefner VA Healthcare System, Salisbury, NC.
4. Department of Translational Neuroscience, Wake Forest School of Medicine, Winston-Salem, NC.
5. Department of Rehabilitation and Human Performance, Icahn School of Medicine at Mount Sinai, New York, NY.
6. Department of Radiology and Medical Imaging, University of Virginia, Charlottesville, VA.
7. National Institutes of Health, National Institute of Nursing Research, Bethesda, MD.
8. Center for Neuroscience and Regenerative Medicine (CNRM), Uniformed Services University, Bethesda, MD.
9. Department of Neurology, Uniformed Services University, Bethesda, MD.
10. National Intrepid Center of Excellence, Walter Reed National Military Medical Center, Bethesda, MD.
11. Department of Medicine, University of Utah School of Medicine, Salt Lake City, UT.
12. Information Decision-Enhancement and Analytic Sciences Center, VA Salt Lake City, Salt Lake City, UT.
13. H. Ben Taub Department of Physical Medicine and Rehabilitation, Baylor College of Medicine, Houston, TX.
14. Michael E. DeBakey Veterans Affairs Medical Center, Houston, TX.
15. Rehabilitation Medicine Department, National Institutes of Health Clinical Center, Bethesda, MD.
16. Department of Radiology and Radiological Sciences, Uniformed Services University, Bethesda, MD.
17. Department of Physical Medicine and Rehabilitation, Virginia Commonwealth University, Richmond, VA.
18. Richmond Veterans Affairs Medical Center, Central Virginia VA Healthcare System, Richmond, VA.
19. Alaska Radiology Associates, Anchorage, AK.

Word count: 3000

Correspondence to:

Dr. Emily L Dennis

TBI and Concussion Center, Dept of Neurology

University of Utah School of Medicine

[emily.dennis@hsc.utah.edu](mailto:emily.dennis@hsc.utah.edu)

## Abstract

**Importance:** Blast-related mild traumatic brain injuries (bTBI), the “signature injury” of post-9/11 conflicts, are associated with clinically-relevant long-term cognitive, psychological, and behavioral dysfunction and disability; however, the underlying neural mechanisms remain unclear.

**Objective:** To investigate associations between a history of remote bTBI and regional brain volume in a sample of United States (U.S.) Veterans and Active Duty Service Members (VADSM).

**Design:** Prospective case-control study of U.S. VADSM of participants from the Long-term Impact of Military-relevant Brain Injury Consortium - Chronic Effects of Neurotrauma Consortium (LIMBIC-CENC), which enrolled over 1,500 participants at five sites used in this analysis between 2014-2023.

**Setting:** Participants were recruited from Veterans Affairs medical centers across the U.S.

**Participants:** Seven hundred and seventy-four VADSM of the U.S. military met eligibility criteria for this analysis.

**Exposure:** All participants had combat exposure, and 82% had one or more lifetime mild TBIs with variable injury mechanisms.

**Main Outcomes and Measures:** Regional brain volume was calculated using tensor-based morphometry on 3D T1-weighted magnetic resonance imaging scans. TBI history, including history of blast-related injury (bTBI), was assessed by structured clinical interview. Cognitive performance and psychiatric symptoms were assessed with a battery of validated instruments. We hypothesized that regional volume would be smaller in the bTBI group, and that this would be associated with cognitive performance.

**Results:** Individuals with a history of bTBI had smaller brain volumes in several clusters, with the largest centered bilaterally in the superior corona radiata and globus pallidus. Greater volume deficits were associated with a larger number of lifetime bTBIs. Additionally, causal mediation analysis revealed that these volume differences significantly mediated the association between bTBI and performance on measures of working memory and processing speed.

**Conclusions and Relevance:** Our results reveal robust volume differences associated with bTBI. Magnetic resonance elastography atlases reveal that the specific regions affected include the stiffest tissues in the brain, which may underlie their vulnerability to pressure waves from blast exposures. Furthermore, these volume differences significantly mediated the association between bTBI and cognitive function, indicating that this may be a helpful biomarker in tracking outcome after bTBI and suggesting potential treatment targets to prevent or limit chronic dysfunction.

## Introduction

Research on blast-related mild traumatic brain injury (bTBI) has increased exponentially over the last two decades, advancing our understanding of mechanisms and outcomes.<sup>1–5</sup> Modern warfare, combat training, and advances in weapons technology have exposed service members to blasts at an alarming rate, and the majority of TBIs that occur in war zones include blast as a mechanism of injury.<sup>6,7</sup> Pre-clinical studies have demonstrated that primary blast forces can directly injure or impair brain structure and function in the absence of other injury mechanisms.<sup>8–10</sup> As with other TBI mechanisms, clinical outcomes post-blast injury are heterogeneous and only partially explained by injury-related factors. While there are obvious distinctions in mechanism in blast versus blunt/impact TBI (hereon referred to as impact TBI), how distinct the pathophysiological alterations are, both acutely and with long-term cognitive, psychological, and functional outcomes, are less clear. A better understanding of the immediate and long-term effects of bTBI is crucial to improving care and developing targeted interventions for neurobehavioral sequelae.

Advanced neuroimaging has revealed structural alterations that support blast as a unique mechanism of TBI, with white matter (WM) alterations consistently associated with bTBI.<sup>2,11–17</sup> Although some studies have identified group differences in specific brain regions, many report spatial heterogeneity, indicating that the pattern of disruption varies across individuals.<sup>11,13,16–18</sup> This inconsistency is likely due to differences in characteristics of each blast exposure including force, direction, additional contemporaneous injury mechanisms (e.g., hit with object, fall from blast energy), and protective factors (e.g., protective gear and physical barriers that partially shield exposure). WM abnormalities have been associated with poor clinical outcomes in several domains including cognition, psychiatric symptoms, and post-concussive symptoms. Additionally, these abnormalities mediate the association between mild TBI (mTBI) and both post-concussive symptoms and cognitive deficits.<sup>16,17</sup> Veterans with bTBI and memory disruption were found to have metabolite decreases in the hippocampus.<sup>19</sup> Changes in either brain volume or cortical thickness have also been associated with blast exposure and bTBI. Most studies examining cortical thickness have shown thinning associated with a history of blast exposure and bTBI months and years post-injury,<sup>20–23</sup> although one study found increased cortical thickness in breachers with repetitive low-intensity blast exposure.<sup>24</sup> Although fewer studies of brain volume have been published, volumetric changes have been noted in the hippocampus.<sup>3,25</sup> bTBI has also been shown to alter brain function,<sup>26</sup> the structure of whole-brain functional connectomes,<sup>27</sup> functional connectivity throughout the brain,<sup>28</sup> and functional connectivity within specific circuits.<sup>29,30</sup> Further, these functional brain imaging changes have also been associated with changes in cognitive performance, specifically working memory.<sup>31</sup>

Together, human and animal studies suggest that bTBI has unique effects on the brain. However, human studies suggest significant individual heterogeneity in blast effects. Novel methods that are robust to this variability are critical for translation to clinical applications. Further, results of structural alterations following bTBI, particularly brain volumes, are sparse and have not been linked to chronic or long-term cognitive outcomes and may suggest that current methods are not sensitive to structural changes following bTBI.

Tensor-based morphometry (TBM) involves mapping a participant image to a reference image and using the resulting warp information to calculate voxelwise differences in volume. TBM offers several benefits over other approaches that measure volume, including greater reliability and power in multi-site studies,<sup>32</sup> and has been applied successfully in mTBI in prior publications, but has not yet been used to study bTBI.<sup>33–35</sup> FreeSurfer segmentations rely on *a priori* regions of interest (ROIs), whereas the whole brain approach of TBM allows for a data-driven analysis. Voxel-based morphometry (VBM) requires tissue segmentation, which can be problematic in injured brains.

The objective of this study is to evaluate the remote effect of bTBI on brain volume on a voxelwise basis, using TBM in a large cohort of well-characterized veterans and active duty service members (VADSM) with remote bTBI, impact mTBI, and no lifetime TBI, and identify whether alterations are related to cognitive outcomes. We hypothesized that TBM would identify specific areas of the brain most sensitive to the effects of bTBI. Changes in these areas were expected to be related to cognitive outcomes, including performance on tests of attention and memory.

## Materials and Methods

### *Participants*

This secondary analysis used participant data from the ongoing Long-term Impact of Military-Relevant Brain Injury Consortium - Chronic Effects of Neurotrauma Consortium (LIMBIC-CENC) Prospective Longitudinal Study that is described at length in prior publications.<sup>36–38</sup> At the time of this dataset extraction, eight sites had participated in data collection. Three sites were excluded from the current analyses due to having too few unexposed control participants for template creation (described below and in further detail in **Supplemental Note 1**). Institutional Review Boards at each site approved this study. All participants provided written informed consent prior to assessment. Inclusion criteria were: 1) prior military combat deployment; 2) combat exposure defined by the Deployment Risk and Resiliency Inventory Section D (DRRI-2-D) score >1 on any item; and 3) at least 18 years of age. Exclusionary criteria were: 1) moderate/severe TBI as defined by standard criteria; or 2) history of major neurologic or psychiatric disorder with significant decrease in functional status and/or loss of ability for independent living (e.g., complete spinal cord injury or schizophrenia).

**Table 1** reports the demographic data of 774 participants that provided usable data (n=670 male,  $M_{age}=40.1$ ,  $SD=9.8$  years).

### *Clinical, Neuropsychological, and Emotional Functioning Data Collection*

Using a structured interview, lifetime history of all possible concussive events (PCEs) was identified.<sup>39</sup> PCEs were assessed and classified as mTBI versus not mTBI according to the VA/DoD common definition.<sup>40</sup> PCE were additionally characterized as occurring during deployment or outside deployment, and as blast-related or non-blast, based on the mechanism of injury. Additional exposures to controlled and uncontrolled blast were also collected.

*Performance and Symptom Validity.* The recommended cut-off scores on the Medical Symptom Validity Test and Neurobehavioral Symptom Inventory Validity-10 index were used to detect suboptimal effort on neuropsychological testing and symptom over-reporting, respectively.<sup>41,42</sup> *Substance Misuse.* Ongoing alcohol consumption within the past three months was evaluated using the Alcohol Use Disorders Identification Test-Concise (AUDIT-C).<sup>43</sup> *Emotional Functioning.* Assessment of current level of posttraumatic stress disorder (PTSD) symptom severity within the past month was obtained using The PTSD Checklist for DSM-5 (PCL-5) and depressive symptoms within the past two weeks assessed using the Patient Health Questionnaire-9 (PHQ-9).<sup>44,45</sup> *Cognitive Functioning.* Visual memory and learning were evaluated using the Brief Visuospatial Memory Test-Revised (BVM-T-R) Total Recall and Delayed Recall, and verbal memory and learning was assessed using the California Verbal Learning Test-II (CVLT-II) Total, Short, and Long Delay Free Recall scores.<sup>46,47</sup> Verbal fluency was evaluated using the Delis-Kaplan Executive Function System (D-KEFS) Letter Fluency and Category Switching Total correct variables.<sup>48</sup> Processing speed was measured using the Wechsler Adult Intelligence Scale 4th Edition (WAIS-IV) Processing Speed Index (PSI), and mental flexibility was assessed using the Trail-Making Test (TMT) -B completion time. A derived score of the completion time of TMT-B-A was used to control for the motor speed element of the test. Working memory was measured using the WAIS-IV Digit Span subtest.<sup>49,50</sup> Raw scores were used for all cognitive measures because age and gender were included as covariates in analyses. All neuropsychological assessments were completed around the same time as the MRI scan.

### *MRI Acquisition*

3D T1-W images were collected using a protocol recommended by the Alzheimer's Disease Neuroimaging Initiative and consistent with other large TBI-based consortia.<sup>51</sup> All sites implemented monitoring throughout to ensure quality and consistency (e.g., geometric accuracy, signal to noise, adherence to major sequence parameters). See **Supplementary Table 1** for scan parameters.

### *Tensor-based Morphometry*

A two-step process was used for creating the study-specific template.<sup>52</sup> Full methods are detailed in **Supplementary Note 1**. Briefly, a site-specific template was created for each of the five sites from 30 unexposed participants without current PTSD, semi-randomly selected to be representative of the overall population. Second, the five site-specific templates were merged into an overall template.

Each participant's T1-weighted MRI was semi-automatically masked using *antsBrainExtraction* with manual corrections and intensity-normalized with N4.<sup>53</sup> Resulting files were registered to the site-specific templates using *unbiased\_pairwise\_registration*.<sup>54,55</sup> Site-specific templates were registered to the overall template using the same algorithm. The registrations were combined to create a single warp file. The resulting warp files were converted into log Jacobian Determinant files, where positive values indicate larger volumes in the participant image than the template and negative values indicate smaller volumes.

## Statistical Analyses

Voxelwise linear mixed effects models were implemented with *lme* in R3.1.3 with site as a random effect, and age and gender as covariates. Intracranial volume (ICV) was not included as a covariate as the affine and rigid registration steps account for differences in overall brain size. Results were corrected for multiple comparisons correction using searchlight FDR<sup>56</sup> and reported as Cohen's *d*.

## Primary Analyses

Our primary group analysis compared individuals with a history of bTBI to those with no history of bTBI (no-bTBI), which included both TBI negative individuals and those with only non-blast mTBI.

## Sensitivity Analyses

We reran the primary comparison with multiple potentially confounding factors included (i.e., PTSD symptoms, depressive symptoms, and/or problematic alcohol use), both as categorical variables using standard cut-off scores and as continuous variables. We additionally re-analyzed covarying for years of education and number of lifetime mTBIs. Within individuals with a history of deployment-related mTBI, we compared the bTBI group to those with impact TBI to separate the blast mechanism from the deployment context. We examined associations between several blast exposure variables and regional volume, including number of bTBIs and number of blast-related PCEs.

## Cognitive Analyses

We examined associations between regional volume and raw scores from the cognitive measures, both across the whole sample and within the bTBI group only. When there was cluster overlap between cognitive performance and results from the primary group comparison, we conducted a modified causal mediation analyses using the R package *mediation*.<sup>57</sup> For these analyses, the initial predictor was bTBI (yes/no), the mediator was cluster volume from the primary group comparison, and the outcome variable was cognitive performance. In the modified causal approach<sup>58</sup> the total effect does not need to be significant to proceed with a mediation analysis if theoretical conditions are met, specifically that the effect of the predictor on outcome is not immediate and that mediation analysis offers greater power than separate bivariate tests.

## Results

### Primary Group Analysis

We found multiple areas of smaller volume in the bTBI group compared to no-bTBI, particularly in subcortical GM and central WM (cluster peak Cohen's *d* range = -0.23 to -0.38; **Figure 1; Table 2**). For follow-up analyses, volumes were extracted for these clusters for each participant by taking the average log Jacobian determinant across the cluster mask. The bilateral superior corona radiata (SCR) clusters were merged into a

single “SCR” mask, and the bilateral globus pallidus (GP) clusters, which overlapped with nucleus accumbens, substantia nigra, cerebellar peduncles, and internal capsule, were merged into a single “GP” mask.

### *Sensitivity Analyses*

Analyses including additional covariates were largely consistent (cluster peak Cohen’s  $d$  range = -0.22 to -0.40, **Supplementary Figure 2**). Results remained when restricting analyses to individuals with deployment mTBI, comparing bTBI to impact mTBI, and when covarying for number of lifetime mTBIs (cluster peak Cohen’s  $d$  range = 0.33 to 0.46).

There was a linear relationship between the number of bTBIs and volume in similar clusters from the primary group analysis (**Supplementary Figure 3**).

### *Cognitive Analyses*

Across the whole sample, CVLT-II and D-KEFS scores had no significant voxelwise associations so were not considered further. For BVMT-R, both the recall and delayed recall scores were positively associated with regional brain volume (**Supplementary Figure 4**). TMT-B and TMT-B-A completion times were negatively associated with volume (shorter completion time=better performance, associated with larger volume, **Supplementary Figure 5**). WAIS-IV PSI and Digit Span performance were positively associated with volume (**Supplementary Figure 6**). Within the bTBI group, TMT-B, TMT B-A, and Digit Span yielded clusters that were overlapping with the results from the primary group comparison (**Supplementary Figure 7**).

The indirect effects for all six mediation analyses (GP and SCR with TMT-B, TMT B-A, and Digit Span) were significant ( $ps<.05$ , **Figure 2**).

## **Discussion**

We demonstrate that VADSMs with a history of bTBI have reduced volume in WM and subcortical GM regions compared to those without bTBI and that are associated with decreased processing speed and working memory. Reduced volumes remained after adjusting for covariates including PTSD symptoms, depressive symptoms, and substance use. Further, these findings were unique to bTBI, as sensitivity analyses revealed that reduced volumes were not present in VADSMs with a history of deployment-related impact mTBI, and held when controlling for total number of lifetime TBIs. Additionally, a bTBI dose effect was observed, with larger volume alterations among individuals with a higher number of lifetime bTBIs. Overall, these results demonstrate long-term negative outcomes among veterans with a history of remote bTBI (mean=9.8 years, SD=5.0 post-injury). Given the high rate of blast as a mechanism of neurotrauma in modern combat theaters, these results underscore the critical need for continued efforts to mitigate blast-related TBI outcomes even when TBI severity is mild and to identify effective interventions that target bTBI pathology, employ currently available and symptom-based targeted clinical interventions, as well as continued prevention strategies to minimize blast exposure forces in combat and training.

We report smaller volume in the bTBI group in the SCR and in bilateral clusters centered around the GP that included the substantia nigra, nucleus accumbens, internal capsule, and cerebellar peduncle. It is well-established that WM is particularly vulnerable to disruption after TBI.<sup>59</sup> The shearing forces of TBI stretch and disrupt axons, causing a chemical and physiological imbalance, or axonopathy with greater focal force.<sup>60,61</sup> Brain tissue stiffness may be another salient outcome of bTBI. Magnetic resonance elastography (MRE) quantifies these characteristics, and studies have shown that the subcortical GM (in particular the pallidum), and WM (in particular projection tracts like the *corona radiata*) have the highest shear stiffness.<sup>62</sup> Less flexible tissues may be more prone to disruption due to a pressure wave, which may partially underlie the vulnerability of these regions to blast injury.

Several studies have demonstrated cortical thinning in bTBI, primarily in the frontal cortex,<sup>21–23</sup> but volumetric associations are less common.<sup>3,63</sup> Our work suggests that there are gross alterations in brain volume remotely after bTBI specifically, and contributes to a growing acknowledgement of the unique and adverse long-term effects of blast exposure and bTBI on brain function. Many combat and training missions continue to involve high levels and prolonged exposure to blast waves. Blast exposure is associated not only with a high rate of TBI, but also PTSD, personality changes, cognitive deficits, and suicidal behavior.<sup>64</sup> Our work adds to these earlier findings by showing measurable changes in brain structure related to differences in cognitive function, unique to bTBI.

MTBI has been linked to changes in cognitive functioning, in particular processing speed and working memory.<sup>65</sup> However, a neuropathological link between mTBI history and changes in cognitive performance has been less frequently reported. In healthy individuals, the regions implicated in processing speed are lateral frontal and temporal cortices, inferior temporal and parietal cortices, and uncinate fasciculus (connecting frontal and temporal regions).<sup>66</sup> Working memory performance is similarly supported by prefrontal structures, along with basal ganglia.<sup>67–69</sup> In mTBI, alterations in WM organization in fronto-thalamic and frontotemporal tracts have been linked to deficits in processing speed and working memory.<sup>70–72</sup> In bTBI, reduced cortical thickness in frontal regions is associated with poorer performance on an executive function composite score.<sup>22</sup> We report that changes in volume partially mediated the relationship between bTBI and measures of processing speed and working memory, providing a potential brain-behavior link. Reductions in processing speed performance involving motor output are often associated with dysfunction in the basal ganglia and frontal cortical-subcortical WM tracts. The inherent variability in structural changes at the individual level significantly reduces the likelihood of observing specific functionally localized impairments (e.g., dysphasia, amnesia, lateralized motor deficits). However, the current results cannot rule out that these changes may occur on an individual basis.

Limitations of our study include the retrospective determination of mTBI-related variables which is susceptible to self-report error such as recall bias; however a validated TBI structured interview was utilized to mitigate this as much as possible, provide robust standardization, and avoid clinician-level bias in diagnosis. Second, we did not have sufficient data to parse whether subconcussive blast exposures have an additional effect. The PLS added data collection of the BETS (Blast Exposure Threshold Survey<sup>73</sup>) in 2020 to address

this limitation but the current sample size for this analysis was insufficient. Third, the group-based analysis we conducted will only detect abnormalities that are consistent across a group, and thus will miss subject-specific abnormalities.

### *Clinical Significance and Future Directions*

These results may aid in prognosticating outcomes after injury. By demonstrating the specific cognitive domains that are affected by bTBI, our findings also inform cognitive rehabilitation targets as well as development of proactive interventions to preserve those functions. Further, these results provide evidence regarding the potential underlying causes of the long-term consequences of bTBI and demonstrate that bTBI has unique consequences compared to deployment mTBI generally. Our results indicate that a history of bTBI should be continuously considered in regular medical care and any subsequent neuropsychological evaluations. MRE studies are needed to look specifically at tissue stiffness and determine whether alterations seen in bTBI are indeed related to these tissue properties. Changes in military strategy, protective equipment, and/or artillery design are necessary to limit brain damage in military service members. Clinicians treating VADSMs should not treat a patient's history of bTBI as a static event but should consider the potential chronic and remote adverse effects on neurobehavioral health over the lifespan.<sup>74</sup>

## Acknowledgements

We gratefully acknowledge the Veterans and Active Duty Service Members who participated in this study. This work was supported by the Assistant Secretary of Defense for Health Affairs endorsed by the Department of Defense, through the Psychological Health/Traumatic Brain Injury Research Program LongTerm Impact of Military Relevant Brain Injury Consortium (LIMBIC) Award W81XWH18PH/TBIRPLIMBIC under Awards No. W81XWH1920067 and W81XWH1320095, and by the U.S. Department of Veterans Affairs Awards No. I01 CX002097, I01 CX002096, I01 HX003155, I01 RX003444, I01 RX003443, I01 RX003442, I01 CX001135, I01 CX001246, I01 RX001774, I01 RX 001135, I01 RX 002076, I01 RX 001880, I01 RX 002172, I01 RX 002173, I01 RX 002171, I01 RX 002174, I01 CX001820, and I01 RX 002170. Dr. Pugh was supported by VA Health Services Research and Development Service Research Career Scientist Award, 1 IK6 HX002608; RCS 17-297. The U.S. Army Medical Research Acquisition Activity, 839 Chandler Street, Fort Detrick MD 217025014 is the awarding and administering acquisition office. Opinions, interpretations, conclusions and recommendations are those of the author and are not necessarily endorsed by the Department of Defense, Department of Veterans Affairs, Defense Health Agency, Uniformed Services University, or Federal Government.

## Conflicts of interest

Dr. Hinds is an employee of SCS Consulting LLC, which has financial affiliations with Major League Soccer Players Association, Nano DX, Owl Therapeutics, Prevent Biometrics, Collaborative Neuropathology Network Characterizing Outcomes of TBI (CONNECT-TBI), United States Army Medical Research and Development Command's Congressionally Directed Medical Research Programs and the National Football League Players Association. Dr. Hinds has not received financial compensation for his work with LIMBIC-CENC. Dr. Hinds is a member of Concussion Legacy Foundation's Veterans Advisory Board; advisory Board member to the University of Michigan Concussion Center; advisor to Gryphon Bio; ad hoc reviewer for VA Brain Health Research; invited reviewer to Congressionally Directed Medical Research Programs; contributor to the National Academy of Science, Engineering, and Medicine "Accelerating Progress in TBI Research and Care"; NASEM TBI Forum committee member (currently inactive); and former contributor to Post-traumatic Epilepsy Research Program. His former Department of Defense work includes: NFL Scientific Advisory Board member; NCAA-DoD CARE Medical Advisory Board Member; DoD Brain Health Research Coordinating Officer and Medical Advisor to the Principal Assistant for Research and Technology (PAR&T), United States Army Medical Research and Development Command (USAMRDC); Ex Officio National Advisory Neurological. All other authors report no relevant disclosures.

## References

1. Warden D. Military TBI during the Iraq and Afghanistan wars. *J Head Trauma Rehabil.* 2006;21(5):398-402.
2. Mac Donald CL, Johnson AM, Cooper D, et al. Detection of blast-related traumatic brain injury in U.S. military personnel. *N Engl J Med.* 2011;364(22):2091-2100.
3. Martindale SL, Shura RD, Rostami R, Taber KH, Rowland JA. Research Letter: Blast Exposure and Brain Volume. *J Head Trauma Rehabil.* 2021;36(6):424-428.
4. Bryden DW, Tilghman JI, Hinds SR 2nd. Blast-Related Traumatic Brain Injury: Current Concepts and Research Considerations. *J Exp Neurosci.* 2019;13:1179069519872213.
5. DePalma RG, Hoffman SW. Combat blast related traumatic brain injury (TBI): Decade of recognition; promise of progress. *Behav Brain Res.* 2018;340:102-105.
6. Phipps H, Mondello S, Wilson A, et al. Characteristics and Impact of U.S. Military Blast-Related Mild Traumatic Brain Injury: A Systematic Review. *Front Neurol.* 2020;11:559318.
7. Salat DH, Robinson ME, Miller DR, Clark DC, McGlinchey RE. Neuroimaging of deployment-associated traumatic brain injury (TBI) with a focus on mild TBI (mTBI) since 2009. *Brain Inj.* 2017;31(9):1204-1219.
8. Li C, Chen S, Siedhoff HR, et al. Low-intensity open-field blast exposure effects on neurovascular unit ultrastructure in mice. *Acta Neuropathol Commun.* 2023;11(1):144.
9. Konan LM, Song H, Pentecost G, et al. Multi-Focal Neuronal Ultrastructural Abnormalities and Synaptic Alterations in Mice after Low-Intensity Blast Exposure. *J Neurotrauma.* 2019;36(13):2117-2128.
10. Siedhoff HR, Chen S, Song H, et al. Perspectives on Primary Blast Injury of the Brain: Translational Insights Into Non-inertial Low-Intensity Blast Injury. *Front Neurol.* 2021;12:818169.
11. Taber KH, Hurley RA, Haswell CC, et al. White matter compromise in veterans exposed to primary blast forces. *J Head Trauma Rehabil.* 2015;30(1):E15-E25.
12. Ivanov I, Fernandez C, Mitsis EM, et al. Blast Exposure, White Matter Integrity, and Cognitive Function in Iraq and Afghanistan Combat Veterans. *Front Neurol.* 2017;8:127.
13. McClelland AC, Fleysher R, Mu W, Kim N, Lipton ML. White matter microstructural abnormalities in blast-exposed combat veterans: accounting for potential pre-injury factors using consanguineous controls. *Neuroradiology.* 2018;60(10):1019-1033.
14. Martindale SL, Rowland JA, Shura RD, Taber KH. Longitudinal changes in neuroimaging and neuropsychiatric status of post-deployment veterans: a CENC pilot study. *Brain Inj.* 2018;32(10):1208-1216.
15. Miller DR, Hayes JP, Lafleche G, Salat DH, Verfaellie M. White matter abnormalities are associated with overall cognitive status in blast-related mTBI. *Brain Imaging Behav.* 2017;11(4):1129-1138.
16. Miller DR, Hayes JP, Lafleche G, Salat DH, Verfaellie M. White matter abnormalities are associated with chronic postconcussion symptoms in blast-related mild traumatic brain injury. *Hum Brain Mapp.* 2016;37(1):220-229.
17. Hayes JP, Miller DR, Lafleche G, Salat DH, Verfaellie M. The nature of white matter abnormalities in blast-related mild traumatic brain injury. *Neuroimage Clin.* 2015;8:148-156.
18. Mac Donald CL, Barber J, Andre J, et al. 5-Year imaging sequelae of concussive blast injury and relation

to early clinical outcome. *Neuroimage Clin.* 2017;14:371-378.

19. Hetherington HP, Hamid H, Kulas J, et al. MRSI of the medial temporal lobe at 7 T in explosive blast mild traumatic brain injury. *Magn Reson Med.* 2014;71(4):1358-1367.
20. Michael AP, Stout J, Roskos PT, et al. Evaluation of Cortical Thickness after Traumatic Brain Injury in Military Veterans. *J Neurotrauma.* 2015;32(22):1751-1758.
21. Eierud C, Nathan DE, Bonavia GH, Ollinger J, Riedy G. Cortical thinning in military blast compared to non-blast persistent mild traumatic brain injuries. *Neuroimage Clin.* 2019;22:101793.
22. Clark AL, Merritt VC, Bigler ED, et al. Blast-Exposed Veterans With Mild Traumatic Brain Injury Show Greater Frontal Cortical Thinning and Poorer Executive Functioning. *Front Neurol.* 2018;9:873.
23. Tate DF, York GE, Reid MW, et al. Preliminary findings of cortical thickness abnormalities in blast injured service members and their relationship to clinical findings. *Brain Imaging Behav.* 2014;8(1):102-109.
24. Stone JR, Avants BB, Tustison NJ, et al. Functional and Structural Neuroimaging Correlates of Repetitive Low-Level Blast Exposure in Career Breachers. *J Neurotrauma.* 2020;37(23):2468-2481.
25. Bandak FA, Ling G, Bandak A, De Lanerolle NC. Injury biomechanics, neuropathology, and simplified physics of explosive blast and impact mild traumatic brain injury. *Handb Clin Neurol.* 2015;127:89-104.
26. Vakhtin AA, Calhoun VD, Jung RE, Prestopnik JL, Taylor PA, Ford CC. Changes in intrinsic functional brain networks following blast-induced mild traumatic brain injury. *Brain Inj.* 2013;27(11):1304-1310.
27. Rowland JA, Stapleton-Kotloski JR, Martindale SL, et al. Alterations in the Topology of Functional Connectomes Are Associated with Post-Traumatic Stress Disorder and Blast-Related Mild Traumatic Brain Injury in Combat Veterans. *J Neurotrauma.* 2021;38(22):3086-3096.
28. Robinson ME, Clark DC, Milberg WP, McGlinchey RE, Salat DH. Characterization of Differences in Functional Connectivity Associated with Close-Range Blast Exposure. *J Neurotrauma.* 2017;34(S1):S53-S61.
29. Newsome MR, Mayer AR, Lin X, et al. Chronic Effects of Blast-Related TBI on Subcortical Functional Connectivity in Veterans. *J Int Neuropsychol Soc.* 2016;22(6):631-642.
30. Gilmore CS, Camchong J, Davenport ND, et al. Deficits in visual system functional connectivity after blast-related mild TBI are associated with injury severity and executive dysfunction. *Brain Behav.* 2016;6(5):e00454.
31. Pagulayan KF, Petrie EC, Cook DG, et al. Effect of blast-related mTBI on the working memory system: a resting state fMRI study. *Brain Imaging Behav.* 2020;14(4):949-960.
32. Jahanshad N, Faskowitz J, Roshchupkin G, et al. Multi-Site Meta-Analysis of Morphometry. *IEEE/ACM Trans Comput Biol Bioinform.* 2019;16(5):1508-1514.
33. Dennis EL, Faskowitz J, Rashid F, et al. Diverging volumetric trajectories following pediatric traumatic brain injury. *Neuroimage Clin.* 2017;15:125-135.
34. Kim J, Avants B, Patel S, et al. Structural consequences of diffuse traumatic brain injury: a large deformation tensor-based morphometry study. *Neuroimage.* 2008;39(3):1014-1026.
35. Dennis EL, Hua X, Villalon-Reina J, et al. Tensor-Based Morphometry Reveals Volumetric Deficits in Moderate/Severe Pediatric Traumatic Brain Injury. *J Neurotrauma.* Published online 2016. doi:10.1089/neu.2015.4012

36. Walker WC, Carne W, Franke LM, et al. The Chronic Effects of Neurotrauma Consortium (CENC) multi-centre observational study: Description of study and characteristics of early participants. *Brain Inj.* 2016;30(12):1469-1480.
37. Walker WC, Hirsch S, Carne W, et al. Chronic Effects of Neurotrauma Consortium (CENC) multicentre study interim analysis: Differences between participants with positive versus negative mild TBI histories. *Brain Injury.* 2018;32(9):1079-1089. doi:10.1080/02699052.2018.1479041
38. Garcia A, Reljic T, Pogoda TK, et al. Obstructive Sleep Apnea Risk Is Associated with Cognitive Impairment after Controlling for Mild Traumatic Brain Injury History: A Chronic Effects of Neurotrauma Consortium Study. *J Neurotrauma.* 2020;37(23):2517-2527.
39. Walker WC, Cifu DX, Hudak AM, Goldberg G, Kunz RD, Sima AP. Structured interview for mild traumatic brain injury after military blast: inter-rater agreement and development of diagnostic algorithm. *J Neurotrauma.* 2015;32(7):464-473.
40. for Disease Control and Prevention C. DoD/VA code proposal: DOD/VA common definition of TBI. , GA: *Centers for Disease Control and ....*
41. Green P. Manual for the medical symptom validity test. *Green's publishing Inc.* Published online 2004.
42. Bodapati AS, Combs HL, Pastorek NJ, et al. Detection of symptom over-reporting on the Neurobehavioral Symptom Inventory in OEF/OIF/OND veterans with history of mild TBI. *Clin Neuropsychol.* 2019;33(3):539-556.
43. Bush K, Kivlahan DR, McDonell MB, Fihn SD, Bradley KA, for the Ambulatory Care Quality Improvement Project (ACQUIP). The AUDIT Alcohol Consumption Questions (AUDIT-C): An Effective Brief Screening Test for Problem Drinking. *Arch Intern Med.* 1998;158(16):1789-1795.
44. Weathers FW, Litz BT, Keane TM, Palmieri PA, Marx BP, Schnurr PP. The ptsd checklist for dsm-5 (pcl-5). *Scale available from the National Center for PTSD at www.ptsd.va.gov.* Published online 2013.
45. Kroenke K, Spitzer RL, Williams JB. The PHQ-9: validity of a brief depression severity measure. *J Gen Intern Med.* 2001;16(9):606-613.
46. Benedict RHB, Schretlen D, Groninger L, Dobraski M, Shpritz B. Revision of the Brief Visuospatial Memory Test: Studies of normal performance, reliability, and validity. *Psychol Assess.* 1996;8(2):145.
47. *California Verbal Learning Test, Second Edition: CvLT-II ; Adult Version ; Manual.* Pearson; 2000.
48. Delis DC, Kaplan E, Kramer JH. *Delis-Kaplan Executive Function System (D-KEFS).* Psychological Corporation; 2001.
49. Reitan RM. Validity of the Trail Making Test as an Indicator of Organic Brain Damage. *Percept Mot Skills.* 1958;8(3):271-276.
50. Wechsler D. Wechsler adult intelligence scale--Fourth Edition (WAIS--IV). *San Antonio, TX: NCS Pearson.* 2008;22(498):1.
51. Jack CR Jr, Barnes J, Bernstein MA, et al. Magnetic resonance imaging in Alzheimer's Disease Neuroimaging Initiative 2. *Alzheimers Dement.* 2015;11(7):740-756.
52. Hua X, Hibar DP, Ching CR, et al. Unbiased tensor-based morphometry: improved robustness and sample size estimates for Alzheimer's disease clinical trials. *Neuroimage.* 2013;66:648-661.
53. Tustison NJ, Avants BB, Cook PA, et al. N4ITK: improved N3 bias correction. *IEEE Trans Med Imaging.* 2010;29(6):1310-1320.

54. Avants BB, Epstein CL, Grossman M, Gee JC. Symmetric diffeomorphic image registration with cross-correlation: evaluating automated labeling of elderly and neurodegenerative brain. *Med Image Anal.* 2008;12(1):26-41.
55. Avants BB, Tustison NJ, Song G, Cook PA, Klein A, Gee JC. A reproducible evaluation of ANTs similarity metric performance in brain image registration. *Neuroimage.* 2011;54(3):2033-2044.
56. Langers DR, Jansen JF, Backes WH. Enhanced signal detection in neuroimaging by means of regional control of the global false discovery rate. *Neuroimage.* 2007;38(1):43-56.
57. Imai K, Keele L, Tingley D, Yamamoto T. Causal Mediation Analysis Using R. In: *Advances in Social Science Research Using R*. Springer New York; 2010:129-154.
58. Shrout PE, Bolger N. Mediation in experimental and nonexperimental studies: new procedures and recommendations. *Psychol Methods.* 2002;7(4):422-445.
59. Hulkower MB, Poliak DB, Rosenbaum SB, Zimmerman ME, Lipton ML. A Decade of DTI in Traumatic Brain Injury: 10 Years and 100 Articles Later. *AJNR Am J Neuroradiol.* Published online 2013. doi:10.3174/ajnr.A3395
60. van Eijck MM, Schoonman GG, van der Naalt J, de Vries J, Roks G. Diffuse axonal injury after traumatic brain injury is a prognostic factor for functional outcome: a systematic review and meta-analysis. *Brain Inj.* 2018;32(4):395-402.
61. Büki A, Povlishock JT. All roads lead to disconnection?--Traumatic axonal injury revisited. *Acta Neurochir.* 2006;148(2):181-193; discussion 193-194.
62. Hiscox LV, McGarry MDJ, Schwarb H, et al. Standard-space atlas of the viscoelastic properties of the human brain. *Hum Brain Mapp.* 2020;41(18):5282-5300.
63. Wilde EA, Bouix S, Tate DF, et al. Advanced neuroimaging applied to veterans and service personnel with traumatic brain injury: state of the art and potential benefits. *Brain Imaging Behav.* 2015;9(3):367-402.
64. Philipps D, Callahan M. A Secret War, Strange New Wounds and Silence From the Pentagon. *The New York Times.* <https://www.nytimes.com/2023/11/05/us/us-army-marines-artillery-isis-pentagon.html>. Published November 5, 2023. Accessed November 16, 2023.
65. Levy AM, Saling MM, Anderson JFI. Frequency and extent of cognitive complaint following adult civilian mild traumatic brain injury: a systematic review and meta-analysis. *Brain Impair.* 2023;24(2):309-332.
66. MacPherson SE, Cox SR, Dickie DA, et al. Processing speed and the relationship between Trail Making Test-B performance, cortical thinning and white matter microstructure in older adults. *Cortex.* 2017;95:92-103.
67. Geva S, Truneh T, Seghier ML, et al. Lesions that do or do not impair digit span: a study of 816 stroke survivors. *Brain Commun.* 2021;3(2):fcab031.
68. Evangelista ND, O'Shea A, Kraft JN, et al. Independent Contributions of Dorsolateral Prefrontal Structure and Function to Working Memory in Healthy Older Adults. *Cereb Cortex.* 2021;31(3):1732-1743.
69. Voytek B, Knight RT. Prefrontal cortex and basal ganglia contributions to visual working memory. *Proc Natl Acad Sci U S A.* 2010;107(42):18167-18172.
70. Taghdiri F, Chung J, Irwin S, et al. Decreased Number of Self-Paced Saccades in Post-Concussion Syndrome Associated with Higher Symptom Burden and Reduced White Matter Integrity. *J Neurotrauma.* 2018;35(5):719-729.

71. Guberman GI, Houde JC, Ptito A, Gagnon I, Descoteaux M. Structural abnormalities in thalamo-prefrontal tracks revealed by high angular resolution diffusion imaging predict working memory scores in concussed children. *bioRxiv*. Published online May 2, 2019:624445. doi:10.1101/624445
72. Bigler ED. Volumetric MRI Findings in Mild Traumatic Brain Injury (mTBI) and Neuropsychological Outcome. *Neuropsychol Rev*. 2023;33(1):5-41.
73. Modica LCM, Egnoto MJ, Statz JK, Carr W, Ahlers ST. Development of a Blast Exposure Estimator from a Department of Defense-Wide Survey Study on Military Service Members. *J Neurotrauma*. 2021;38(12):1654-1661.
74. Dams-O'Connor K, Juengst SB, Bogner J, et al. Traumatic brain injury as a chronic disease: insights from the United States Traumatic Brain Injury Model Systems Research Program. *Lancet Neurol*. 2023;22(6):517-528.

**Table 1. Demographic information across sites.** For each site included in this analysis, we list the total sample size, the number of males and females, age in years (average and standard deviation), number and percent of participants with a history of any mTBI, deployment-related mTBI, and bTBI, years since last TBI (average and range), years of education (average and standard deviation), active duty status (number and percent), and service branch (percent). Air Force, Army, Marine Corps, and Navy each include their respective Reserves and National Guard divisions.

|                          | N (M/F)       | Age (avg   SD) | Any TBI (N   %) | Deployment-related TBI (N   %) | Blast-related TBI (N   %) | Time since last TBI (years, avg   range) | Education (years, avg   SD) | Active duty service members | Service branch (%; Air Force   Army   Marine Corps   Navy   No answer) |
|--------------------------|---------------|----------------|-----------------|--------------------------------|---------------------------|------------------------------------------|-----------------------------|-----------------------------|------------------------------------------------------------------------|
| Richmond, VA (Site 1)    | 252 (207/45)  | 44.5   9.6     | 192   76%       | 115   46%                      | 70   31%                  | 13.4   0.3-51.5                          | 14.5   1.6                  | 38   15.1%                  | 8.7   71.8   12.7   6.3   0.4                                          |
| Houston, TX (Site 2)     | 157 (143/14)  | 34.0   7.3     | 125   80%       | 102   65%                      | 70   44%                  | 8.1   0.4-30.4                           | 13.4   1.5                  | 8   5.1%                    | 7.6   65.0   18.5   8.3   0.6                                          |
| Tampa, FL (Site 3)       | 205 (177/28)  | 38.9   9.2     | 162   79%       | 112   55%                      | 77   38%                  | 8.7   0.2-50.6                           | 14.1   1.6                  | 38   18.5%                  | 12.7   67.3   12.2.   7.8   0                                          |
| Portland, OR (Site 6)    | 66 (59/7)     | 40   9.5       | 56   85%        | 29   44%                       | 19   29%                  | 13.1   0.6-38.1                          | 14.4   1.6                  | 5   7.6%                    | 16.7   54.5   15.2   13.6   0                                          |
| Minneapolis, MN (Site 7) | 94 (84/10)    | 41.2   10.0    | 63   67%        | 33   35%                       | 16   17%                  | 16.9   0.5-48.6                          | 14.6   1.6                  | 15   16%                    | 9.6   73.4   9.6   7.4   0                                             |
| Total                    | 774 (670/104) | 40.1   9.8     | 598   77%       | 391   50%                      | 260   34%                 | 11.4   0.2-51.5                          | 14.2   1.6                  | 104   13.4%                 | 10.3   68.0   13.6   7.9   0.3                                         |

**Figure 1. Differences in regional volume between participants with and without a history of bTBI.** Clusters showing significantly smaller volumes are shown, with color corresponding to Cohen's  $d$ . Left in image is right in brain. Orange clusters indicate larger volumes, most of which are not visible from this view.

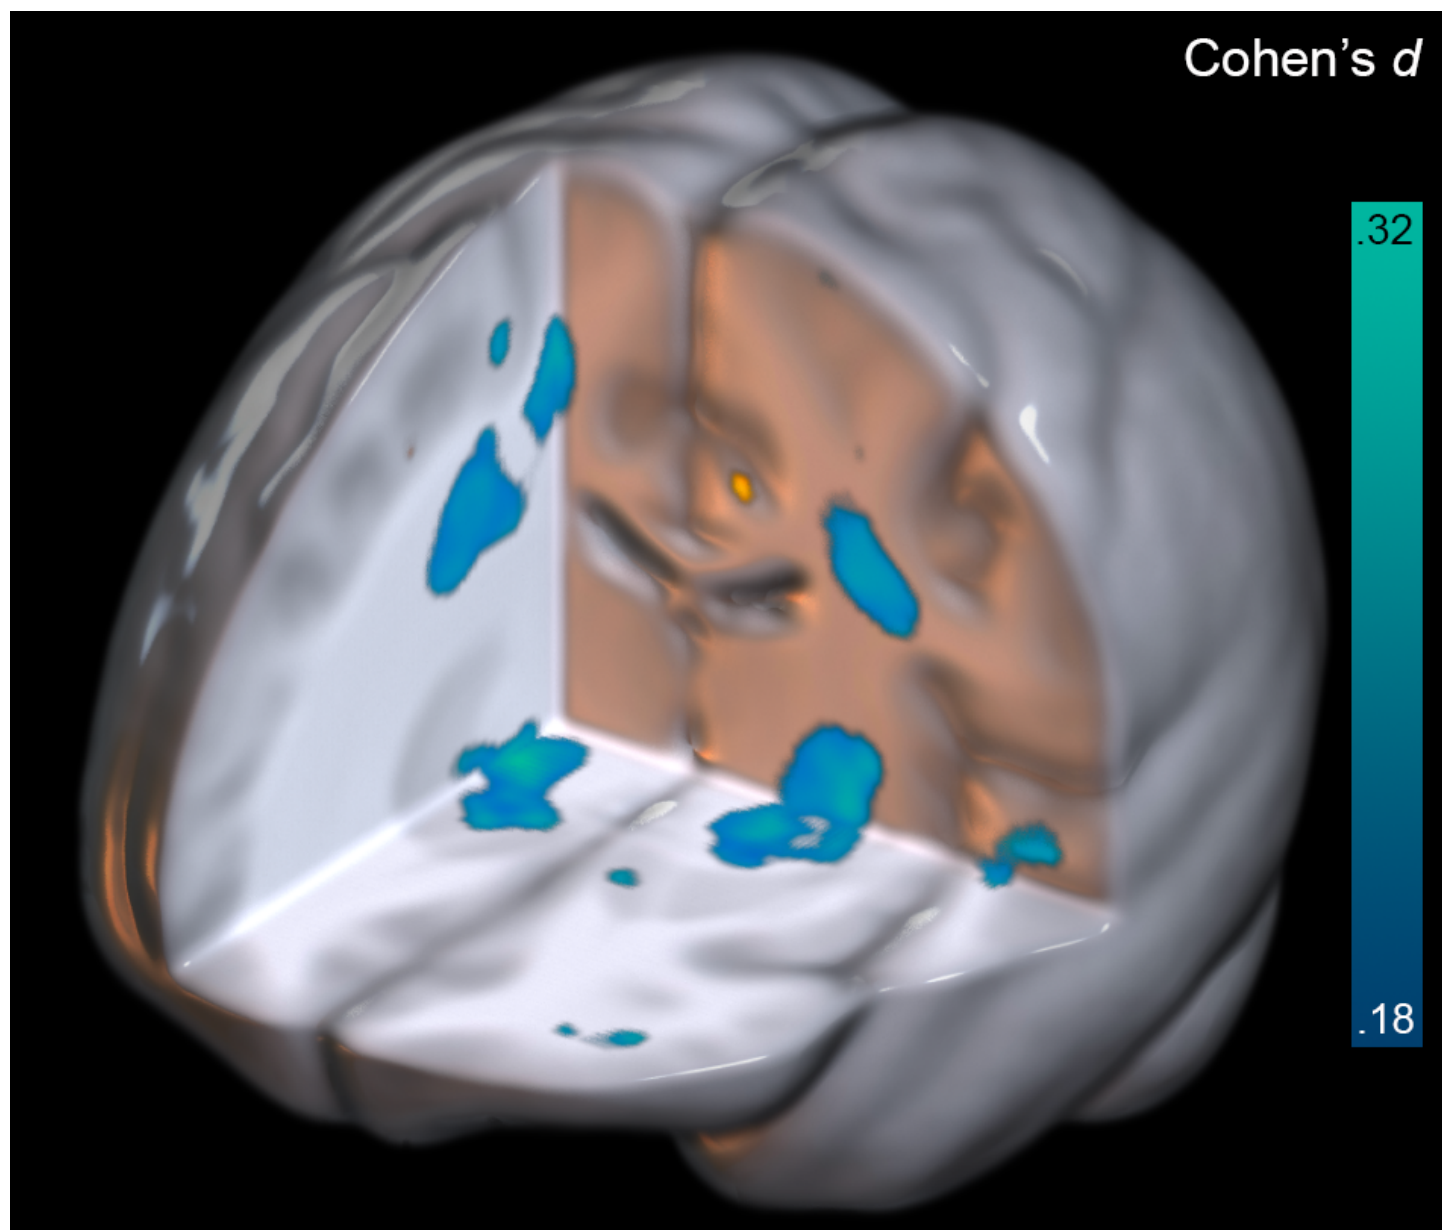

**Table 2. Group differences in volume.** Clusters showing significant volumetric differences are shown. For each cluster the cluster size, maximum Cohen's *d*, MNI coordinates, region, and tissue type are shown. R=right, L=left, WM=white matter, GM = gray matter.

| Positive |                      |     |     |     |      |                                          |        |
|----------|----------------------|-----|-----|-----|------|------------------------------------------|--------|
| Voxels   | MAX Cohen's <i>d</i> | X   | Y   | Z   | Side | Structure                                | Tissue |
| 1911     | 0.252                | 18  | -68 | -35 | R    | Cerebellum                               | WM     |
| 1425     | 0.315                | 30  | -61 | -2  | R    | Lingual gyrus                            | WM     |
| 1371     | 0.38                 | 32  | 32  | 6   | R    | Inferior frontal gyrus                   | WM     |
| 1305     | 0.278                | -34 | 26  | 1   | L    | Insula                                   | GM     |
| 934      | 0.27                 | -24 | -55 | -3  | L    | Lingual gyrus                            | GM     |
| 561      | 0.282                | 56  | -47 | 0   | R    | Middle temporal gyrus                    | WM     |
| 528      | 0.263                | -22 | -51 | -48 | L    | Cerebellum lobule VIIIB                  | GM     |
| 385      | 0.324                | 29  | 15  | 54  | R    | Middle frontal gyrus                     | GM     |
| 336      | 0.274                | 4   | -57 | -35 | R    | Cerebellum Vermis IX                     | GM     |
| 269      | 0.303                | 38  | -8  | -20 | R    | Middle temporal gyrus                    | WM     |
| 177      | 0.262                | -46 | -63 | 14  | L    | Middle temporal gyrus                    | GM     |
| 117      | 0.277                | 29  | 12  | -19 | R    | Posterior orbital gyrus                  | GM     |
| 51       | 0.27                 | -27 | -63 | 65  | L    | Superior parietal lobule                 | GM     |
| 50       | 0.273                | 20  | -89 | 36  | R    | Cuneus                                   | GM     |
| Negative |                      |     |     |     |      |                                          |        |
| Voxels   | MAX Cohen's <i>d</i> | X   | Y   | Z   | Side | Structure                                | Tissue |
| 5300     | 0.311                | 39  | -13 | 67  | R    | Superior corona radiata/Precentral gyrus | WM     |
| 4397     | 0.294                | -26 | -11 | -3  | L    | Globus pallidus/Thalamus/Putamen         | GM     |
| 3645     | 0.293                | -27 | -10 | 37  | L    | Superior corona radiata                  | WM     |
| 2106     | 0.322                | 18  | -3  | -7  | R    | Globus pallidus/Thalamus/Putamen         | GM     |
| 1939     | 0.321                | 36  | 62  | 2   | R    | Middle frontal gyrus                     | GM     |
| 1763     | 0.321                | 49  | -70 | -35 | R    | Cerebellum Crus I                        | GM     |
| 696      | 0.279                | 2   | -5  | 27  | R    | Corpus callosum/cingulum                 | WM     |
| 433      | 0.281                | -29 | -29 | 36  | L    | Superior corona radiata                  | WM     |
| 389      | 0.278                | -49 | -16 | -1  | L    | Superior temporal gyrus                  | WM     |
| 349      | 0.281                | -1  | -93 | 10  | L    | Cuneus                                   | GM     |
| 322      | 0.27                 | -39 | -80 | -36 | L    | Cerebellum Crus I                        | GM     |
| 316      | 0.295                | 42  | 57  | 9   | R    | Middle frontal gyrus                     | GM     |
| 303      | 0.262                | 41  | -61 | -52 | R    | Cerebellum lobule VII                    | GM     |
| 230      | 0.294                | -7  | 56  | 5   | L    | Superior frontal gyrus                   | GM     |
| 211      | 0.25                 | -24 | -56 | 32  | L    | Superior parietal lobule                 | WM     |
| 203      | 0.256                | -38 | -11 | -43 | L    | Inferior temporal gyrus                  | GM     |
| 150      | 0.283                | -37 | 50  | -4  | L    | Middle frontal gyrus                     | WM     |
| 124      | 0.263                | -4  | -77 | -23 | L    | Cerebellum lobule VII                    | GM     |
| 122      | 0.253                | 62  | 1   | 17  | R    | Precentral gyrus                         | GM     |
| 103      | 0.232                | 24  | -23 | 8   | R    | Internal capsule                         | WM     |
| 75       | 0.242                | 21  | -1  | 56  | R    | Superior frontal gyrus                   | WM     |
| 75       | 0.267                | 37  | -3  | 30  | R    | Superior corona radiata                  | WM     |
| 73       | 0.258                | 38  | 49  | 17  | R    | Middle frontal gyrus                     | GM     |
| 67       | 0.254                | 52  | 24  | 10  | R    | Inferior temporal gyrus                  | GM     |
| 58       | 0.226                | -22 | 49  | 0   | L    | Superior frontal gyrus                   | WM     |
| 54       | 0.271                | 28  | -19 | -25 | R    | Hippocampal cingulum                     | WM     |

**Figure 2. Causal mediation analyses.** Results of causal mediation analyses run in R using *mediation* package. For these analyses, the initial predictor was bTBI (yes/no), the mediator was volume of either the superior corona radiata- or globus pallidus-centered clusters (derived as described above in the *Primary Group Analysis* section and depicted in **Figure 1**), and the outcome variable was TMT-B completion time, TMT-B-A, or Total Digit Span.

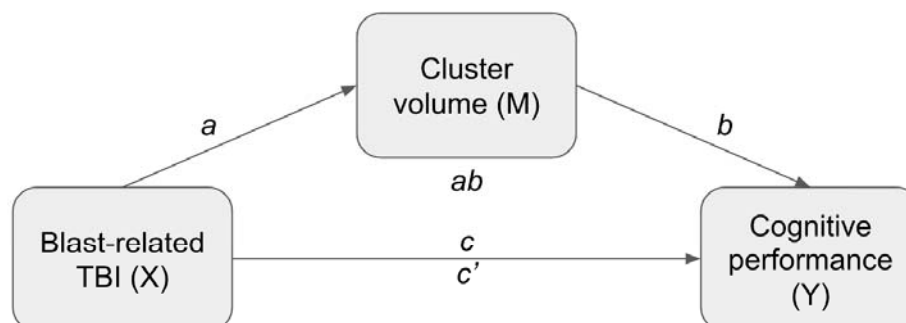

| <b>Mediator</b>                          | <b>Outcome variable</b> | <b>a (blast-volume)</b> | <b>b (volume-outcome)</b> | <b>c (blast-outcome, total effect)</b> | <b>c' (blast-outcome, direct effect)</b> | <b>ab (effect of blast on outcome through volume)</b> |
|------------------------------------------|-------------------------|-------------------------|---------------------------|----------------------------------------|------------------------------------------|-------------------------------------------------------|
| Bilateral globus pallidus volume         | TMT-B                   | -0.028**                | -0.0062*                  | 2.3                                    | 1.6                                      | 0.70**                                                |
|                                          | TMT-B - TMT-A           |                         | -0.0070*                  | 1.2                                    | 0.73                                     | 0.49*                                                 |
|                                          | Digit Span              |                         | 0.025*                    | 0.02                                   | 0.15                                     | -0.13**                                               |
| Bilateral superior corona radiata volume | TMT-B                   | -0.035***               | -0.0062*                  | 2.3                                    | 1.2                                      | 1.1**                                                 |
|                                          | TMT-B - TMT-A           |                         | -0.0070*                  | 1.2                                    | 0.53                                     | 0.69*                                                 |
|                                          | Digit Span              |                         | 0.034**                   | 0.02                                   | 0.31                                     | -0.29***                                              |
| . 0.1 * 0.05 ** 0.01 *** 0.001           |                         |                         |                           |                                        |                                          |                                                       |
